# Supplementary material
Source: MDPI journal article supplement (https://www.mdpi.com/2073-445X/12/7/1433)
Supplement: s1 [file s1]

**Supplementary Table S1.** Environmental predictors used in the MaxEnt species distribution model (SDM) for *Aegle marmelos* from the studied locality.

| Name of Variable & Description                  | Code     | Unit       | Resolution | Database                                                                          |
|-------------------------------------------------|----------|------------|------------|-----------------------------------------------------------------------------------|
| Annual Mean Temperature                         | Bio1     | °C         | 30 arc s   | WorldClim                                                                         |
| Mean Diurnal Range                              | Bio2     | °C         | 30 arc s   | WorldClim                                                                         |
| Isothermality (Bio2/Bio7) (×100)                | Bio3     | Percent    | 30 arc s   | WorldClim                                                                         |
| Temperature Seasonality (sd ×100)               | Bio4     | °C         | 30 arc s   | WorldClim                                                                         |
| Max. Temperature of Warmest Month               | Bio5     | °C         | 30 arc s   | WorldClim                                                                         |
| Min. Temperature of Coldest Month               | Bio6     | °C         | 30 arc s   | WorldClim                                                                         |
| Temperature Annual Range                        | Bio7     | °C         | 30 arc s   | WorldClim                                                                         |
| Mean Temperature of Wettest Quarter             | Bio8     | °C         | 30 arc s   | WorldClim                                                                         |
| Mean Temperature of Driest Quarter              | Bio9     | °C         | 30 arc s   | WorldClim                                                                         |
| Mean Temperature of Warmest Quarter             | Bio10    | °C         | 30 arc s   | WorldClim                                                                         |
| Mean Temperature of Coldest Quarter             | Bio11    | °C         | 30 arc s   | WorldClim                                                                         |
| Annual Precipitation                            | Bio12    | Mm         | 30 arc s   | WorldClim                                                                         |
| Precipitation of Wettest Month                  | Bio13    | Mm         | 30 arc s   | WorldClim                                                                         |
| Precipitation of Driest Month                   | Bio14    | Mm         | 30 arc s   | WorldClim                                                                         |
| Precipitation Seasonality (CV)                  | Bio15    | Percent    | 30 arc s   | WorldClim                                                                         |
| Precipitation of Wettest Quarter                | Bio16    | Mm         | 30 arc s   | WorldClim                                                                         |
| Precipitation of Driest Quarter                 | Bio17    | Mm         | 30 arc s   | WorldClim                                                                         |
| Precipitation of Warmest Quarter                | Bio18    | Mm         | 30 arc s   | WorldClim                                                                         |
| Precipitation of Coldest Quarter                | Bio19    | Mm         | 30 arc s   | WorldClim                                                                         |
| Bulk Density                                    | Bdod     | cg/cm3     | 30 arc s   | SoilGrids                                                                         |
| Cations Exchange Capacity (pH: 7)               | Cec      | mmol(c)/kg | 30 arc s   | SoilGrids                                                                         |
| Volumetric fraction of coarse fragments (>2 mm) | Cfvo     | cm3/dm3    | 30 arc s   | SoilGrids                                                                         |
| Clay Contents                                   | Clay     | g/kg       | 30 arc s   | SoilGrids                                                                         |
| Total Nitrogen                                  | Nitrogen | cg/kg      | 30 arc s   | SoilGrids                                                                         |
| Organic Carbon Density                          | Ocd      | hg/dm3     | 30 arc s   | SoilGrids                                                                         |
| Soil pH × 10                                    | Phh2o    | Nil        | 30 arc s   | SoilGrids                                                                         |
| Sand Contents                                   | Sand     | g/kg       | 30 arc s   | SoilGrids                                                                         |
| Silt Contents                                   | Silt     | g/kg       | 30 arc s   | SoilGrids                                                                         |
| Soil Organic Carbon                             | Soc      | dg/kg      | 30 arc s   | SoilGrids                                                                         |
| Land cover                                      | LC       | Nil        | 30 arc s   | <a href="http://www-modis.bu.edu/landcover">http://www-modis.bu.edu/landcover</a> |

|                    |    |     |          |                                                                                 |
|--------------------|----|-----|----------|---------------------------------------------------------------------------------|
| Population density | PD | Nil | 30 arc s | <a href="http://www.ornl.gov/sci/landscan">http://www.ornl.gov/sci/landscan</a> |
|--------------------|----|-----|----------|---------------------------------------------------------------------------------|

**Supplementary Table S2.** Species Presence locations

| Location | Latitude | Longitude |
|----------|----------|-----------|
| 1        | 32.18668 | 74.79575  |
| 2        | 31.94314 | 74.09289  |
| 3        | 31.29426 | 74.08727  |
| 4        | 31.02218 | 74.30835  |
| 5        | 30.93083 | 74.27167  |
| 6        | 31.16132 | 73.68721  |
| 7        | 30.76193 | 73.79264  |
| 8        | 30.57895 | 73.7373   |
| 9        | 31.17339 | 73.26557  |
| 10       | 30.85688 | 72.77072  |
| 11       | 30.31223 | 72.96661  |
| 12       | 31.02579 | 72.28182  |
| 13       | 31.87844 | 72.4364   |
| 14       | 31.10284 | 71.66724  |
| 15       | 32.26249 | 72.37295  |
| 16       | 32.87688 | 72.80967  |
| 17       | 33.34642 | 71.70327  |
| 18       | 32.58604 | 70.91163  |
| 19       | 31.27063 | 70.90184  |
| 20       | 30.38961 | 71.1155   |
| 21       | 29.74259 | 71.40743  |
| 22       | 29.34908 | 71.38498  |
| 23       | 29.45281 | 70.51144  |
| 24       | 28.82623 | 70.07085  |
| 25       | 31.11491 | 72.9826   |
| 26       | 30.50253 | 73.22134  |
| 27       | 31.34549 | 73.24211  |
| 28       | 31.92669 | 73.74301  |
| 29       | 32.5228  | 72.60392  |
| 30       | 29.74353 | 73.05392  |
| 31       | 30.89909 | 72.04649  |
| 32       | 31.57814 | 70.15241  |

|    |          |          |
|----|----------|----------|
| 33 | 28.18322 | 69.35256 |
| 34 | 28.21894 | 68.44382 |
| 35 | 27.83326 | 68.20825 |
| 36 | 27.37089 | 68.38957 |
| 37 | 28.48465 | 69.96445 |
| 38 | 29.08408 | 71.50096 |
| 39 | 32.40503 | 73.70629 |
| 40 | 33.23443 | 72.11135 |
| 41 | 33.80122 | 71.44721 |
| 42 | 33.81252 | 72.71209 |
| 43 | 33.65246 | 73.34578 |
